# Supplementary material for: An Improved Branch-Cut-and-Price Algorithm for Parallel Machine Scheduling Problems
Source: Atypon-hosted journal article supplement (doi:10.1287/ijoc.2018.0854), 2019-07-16
Supplement: ijoc.2018.0854.sm1.pdf [file ijoc.2018.0854.sm1.pdf]

Authors are encouraged to submit new papers to INFORMS journals by means of a style file template, which includes the journal title. However, use of a template does not certify that the paper has been accepted for publication in the named journal. INFORMS journal templates are for the exclusive purpose of submitting to an INFORMS journal and should not be used to distribute the papers in print or online or to submit the papers to another publication.

# Online Supplement

## An Improved Branch-Cut-and-Price Algorithm for Parallel Machine Scheduling Problems

Daniel Oliveira

Department of Combinatorics and Optimization, University of Waterloo, Canada  
ddoliveira@uwaterloo.ca

Artur Pessoa

Departamento de Engenharia de Produção, Universidade Federal Fluminense, Brazil  
artur@producao.uff.br

---

This Online Supplement contains accompanying detailed computational results associated with the paper An Improved Branch-Cut-and-Price Algorithm for Parallel Machine Scheduling Problems, accepted for publication in the INFORMS Journal on Computing, 2018. All instances are available at: <https://github.com/danieloliveira56/schedWT>

### 1. Detailed computational results

Table A1: Root relaxation and cut separation results

| n  | m | Inst | UB    | 1 <sup>st</sup> LB | BCP-PMWT Root |        |        | BCP-PMWT-OTI Root* |        |        | BCP-PMWT-OTI Root |     |       |
|----|---|------|-------|--------------------|---------------|--------|--------|--------------------|--------|--------|-------------------|-----|-------|
|    |   |      |       |                    | LB            | Gap    | Time   | LB                 | Gap    | Time   | LB                | Gap | Time  |
| 40 | 2 | 1    | 606   | 584                | 606           |        | 63.50  | 606                |        | 36.42  | 606               |     | 21.90 |
| 40 | 2 | 6    | 3886  | 3875               | 3886          |        | 11.80  | 3886               |        | 6.50   | 3886              |     | 6.70  |
| 40 | 2 | 11   | 9617  | 9592               | 9617          |        | 6.40   | 9617               |        | 3.87   | 9617              |     | 5.10  |
| 40 | 2 | 16   | 38356 | 38279              | 38356         |        | 41.80  | 38356              |        | 591.89 | 38356             |     | 32.50 |
| 40 | 2 | 31   | 3812  | 3758               | 3812          |        | 29.20  | 3812               |        | 20.23  | 3812              |     | 5.80  |
| 40 | 2 | 36   | 10713 | 10662              | 10713         |        | 50.70  | 10703              | 0.093% | 153.65 | 10713             |     | 8.10  |
| 40 | 2 | 56   | 1279  | 1272               | 1279          |        | 8.30   | 1279               |        | 6.90   | 1279              |     | 5.70  |
| 40 | 2 | 61   | 11488 | 11311              | 11394         | 0.818% | 684.80 | 11388              | 0.870% | 359.36 | <b>11488</b>      |     | 11.10 |

Table A1: continued

| n  | m | Inst | UB     | 1 <sup>st</sup> LB | BCP-PMWT Root |        |         | BCP-PMWT-OTI Root* |        |         | BCP-PMWT-OTI Root |        |        |
|----|---|------|--------|--------------------|---------------|--------|---------|--------------------|--------|---------|-------------------|--------|--------|
|    |   |      |        |                    | LB            | Gap    | Time    | LB                 | Gap    | Time    | LB                | Gap    | Time   |
| 40 | 2 | 66   | 35279  | 35130              | 35197         | 0.232% | 200.60  | 35195              | 0.238% | 157.92  | <b>35233</b>      | 0.130% | 556.10 |
| 40 | 2 | 71   | 47952  | 47935              | 47952         |        | 0.90    | 47952              |        | 1.97    | 47952             |        | 6.50   |
| 40 | 2 | 81   | 571    | 452                | 571           |        | 67.60   | 571                |        | 46.90   | 571               |        | 18.50  |
| 40 | 2 | 86   | 6048   | 5996               | 6048          |        | 31.90   | 6042               | 0.099% | 76.58   | 6048              |        | 5.20   |
| 40 | 2 | 96   | 66116  | 66111              | 66116         |        | 1.20    | 66116              |        | 1.05    | 66116             |        | 4.30   |
| 40 | 2 | 111  | 17936  | 17898              | 17936         |        | 3.50    | 17936              |        | 4.98    | 17936             |        | 6.00   |
| 40 | 2 | 116  | 25870  | 25786              | 25870         |        | 44.40   | 25870              |        | 44.17   | 25870             |        | 9.80   |
| 40 | 2 | 121  | 64516  | 64507              | 64516         |        | 1.00    | 64516              |        | 0.98    | 64516             |        | 4.40   |
| 40 | 4 | 1    | 439    | 438                | 439           |        | 1.70    | 439                |        | 1.29    | 439               |        | 3.90   |
| 40 | 4 | 6    | 2374   | 2372               | 2374          |        | 2.30    | 2374               |        | 1.15    | 2374              |        | 3.70   |
| 40 | 4 | 11   | 5737   | 5735               | 5737          |        | 0.50    | 5737               |        | 0.66    | 5737              |        | 3.20   |
| 40 | 4 | 16   | 21493  | 21484              | 21490         | 0.014% | 19.90   | 21493              |        | 19.93   | 21493             |        | 24.50  |
| 40 | 4 | 31   | 2525   | 2496               | 2500          | 0.990% | 39.30   | 2500               | 0.990% | 11.61   | <b>2507</b>       | 0.713% | 29.70  |
| 40 | 4 | 36   | 6420   | 6355               | 6364          | 0.872% | 26.50   | 6364               | 0.872% | 29.21   | <b>6367</b>       | 0.826% | 16.40  |
| 40 | 4 | 41   | 17685  | 17634              | 17637         | 0.271% | 24.30   | 17637              | 0.271% | 11.97   | <b>17639</b>      | 0.260% | 14.10  |
| 40 | 4 | 56   | 826    | 798                | <b>817</b>    | 1.090% | 45.50   | 814                | 1.453% | 16.06   | 815               | 1.332% | 29.50  |
| 40 | 4 | 61   | 7357   | 7316               | 7322          | 0.476% | 22.80   | 7322               | 0.476% | 27.69   | <b>7327</b>       | 0.408% | 40.10  |
| 40 | 4 | 66   | 20251  | 20247              | 20251         |        | 1.70    | 20251              |        | 1.04    | 20251             |        | 2.90   |
| 40 | 4 | 81   | 564    | 550                | 560           | 0.709% | 37.90   | 560                | 0.709% | 20.81   | 560               | 0.709% | 19.60  |
| 40 | 4 | 86   | 4725   | 4719               | 4725          |        | 6.80    | 4725               |        | 3.12    | 4725              |        | 6.10   |
| 40 | 4 | 91   | 15569  | 15557              | 15562         | 0.045% | 27.00   | 15562              | 0.045% | 13.28   | 15562             | 0.045% | 17.90  |
| 40 | 4 | 111  | 11263  | 11212              | 11219         | 0.391% | 58.60   | 11217              | 0.408% | 15.79   | <b>11222</b>      | 0.364% | 17.30  |
| 40 | 4 | 116  | 15566  | 15539              | 15545         | 0.135% | 19.70   | 15545              | 0.135% | 19.41   | <b>15547</b>      | 0.122% | 19.20  |
| 40 | 4 | 121  | 35751  | 35739              | 35741         | 0.028% | 39.10   | 35741              | 0.028% | 9.86    | 35741             | 0.028% | 15.60  |
| 50 | 2 | 1    | 1268   | 1232               | 1268          |        | 296.60  | 1268               |        | 433.80  | 1268              |        | 28.80  |
| 50 | 2 | 6    | 14272  | 14261              | 14272         |        | 63.10   | 14272              |        | 42.35   | 14272             |        | 10.00  |
| 50 | 2 | 11   | 23028  | 23000              | 23028         |        | 21.30   | 23028              |        | 10.76   | 23028             |        | 10.90  |
| 50 | 2 | 16   | 46072  | 46011              | 46072         |        | 25.10   | 46072              |        | 21.19   | 46072             |        | 17.70  |
| 50 | 2 | 21   | 111069 | 111067             | 111069        |        | 0.70    | 111069             |        | 0.79    | 111069            |        | 6.80   |
| 50 | 2 | 31   | 5378   | 5289               | 5349          | 0.539% | 1060.20 | 5349               | 0.539% | 223.79  | <b>5378</b>       |        | 21.10  |
| 50 | 2 | 36   | 18956  | 18895              | 18956         |        | 26.80   | 18956              |        | 26.62   | 18956             |        | 9.10   |
| 50 | 2 | 41   | 38058  | 37968              | 38050         | 0.021% | 341.60  | 38034              | 0.063% | 1615.95 | <b>38058</b>      |        | 58.00  |
| 50 | 2 | 46   | 82105  | 82085              | 82105         |        | 31.50   | 82105              |        | 26.33   | 82105             |        | 31.40  |
| 50 | 2 | 56   | 761    | 730                | 761           |        | 232.70  | 761                |        | 78.36   | 761               |        | 13.90  |
| 50 | 2 | 61   | 13682  | 13589              | 13619         | 0.460% | 614.00  | 13617              | 0.475% | 469.34  | <b>13682</b>      |        | 22.60  |
| 50 | 2 | 66   | 40907  | 40904              | 40907         |        | 0.60    | 40907              |        | 0.67    | 40907             |        | 6.30   |
| 50 | 2 | 81   | 542    | 538                | 542           |        | 5.30    | 542                |        | 2.34    | 542               |        | 8.90   |
| 50 | 2 | 86   | 12557  | 12277              | 12427         | 1.035% | 946.70  | 12415              | 1.131% | 323.63  | <b>12557</b>      |        | 17.80  |
| 50 | 2 | 91   | 47349  | 47294              | 47330         | 0.040% | 492.30  | 47330              | 0.040% | 649.79  | <b>47349</b>      |        | 8.70   |
| 50 | 2 | 96   | 92822  | 92803              | 92822         |        | 6.30    | 92822              |        | 5.87    | 92822             |        | 7.30   |
| 50 | 2 | 111  | 15564  | 15544              | 15564         |        | 3.50    | 15564              |        | 5.60    | 15564             |        | 9.30   |
| 50 | 2 | 116  | 19608  | 19524              | 19573         | 0.178% | 453.30  | 19572              | 0.184% | 712.41  | <b>19608</b>      |        | 47.10  |
| 50 | 4 | 1    | 785    | 777                | 785           |        | 24.80   | 785                |        | 33.58   | 785               |        | 29.00  |
| 50 | 4 | 6    | 8317   | 8298               | 8304          | 0.156% | 110.80  | 8304               | 0.156% | 35.30   | 8304              | 0.157% | 33.70  |
| 50 | 4 | 11   | 12879  | 12871              | 12875         | 0.031% | 71.20   | 12875              | 0.031% | 39.81   | <b>12876</b>      | 0.023% | 34.60  |
| 50 | 4 | 16   | 25376  | 25375              | 25376         |        | 8.00    | 25376              |        | 5.96    | 25376             |        | 9.20   |
| 50 | 4 | 36   | 10796  | 10794              | 10796         |        | 5.00    | 10796              |        | 1.55    | 10796             |        | 5.60   |
| 50 | 4 | 41   | 21806  | 21783              | 21785         | 0.096% | 44.90   | 21786              | 0.092% | 79.51   | 21786             | 0.092% | 59.10  |
| 50 | 4 | 46   | 44455  | 44452              | <b>44455</b>  |        | 15.10   | 44453              | 0.004% | 25.61   | 44453             | 0.004% | 17.10  |
| 50 | 4 | 56   | 570    | 538                | 541           | 5.088% | 45.80   | 541                | 5.088% | 26.29   | 540               | 5.556% | 14.20  |
| 50 | 4 | 61   | 7898   | 7850               | 7857          | 0.519% | 81.80   | 7856               | 0.532% | 44.74   | 7857              | 0.522% | 49.30  |
| 50 | 4 | 71   | 42645  | 42625              | 42628         | 0.040% | 138.40  | 42628              | 0.040% | 41.61   | 42627             | 0.042% | 19.00  |
| 50 | 4 | 81   | 495    | 478                | 495           |        | 64.90   | 495                |        | 49.95   | 495               |        | 26.30  |

Table A1: continued

| n   | m | Inst | UB     | 1 <sup>st</sup> LB | BCP-PMWT Root |        |          | BCP-PMWT-OTI Root* |        |         | BCP-PMWT-OTI Root |        |         |
|-----|---|------|--------|--------------------|---------------|--------|----------|--------------------|--------|---------|-------------------|--------|---------|
|     |   |      |        |                    | LB            | Gap    | Time     | LB                 | Gap    | Time    | LB                | Gap    | Time    |
| 50  | 4 | 86   | 8369   | 8330               | 8336          | 0.394% | 163.30   | 8336               | 0.394% | 52.30   | 8336              | 0.396% | 69.90   |
| 50  | 4 | 91   | 26551  | 26546              | 26548         | 0.011% | 111.60   | 26551              |        | 9.69    | 26551             |        | 12.40   |
| 50  | 4 | 96   | 50326  | 50312              | 50317         | 0.018% | 91.00    | 50316              | 0.020% | 54.30   | <b>50325</b>      | 0.002% | 77.10   |
| 50  | 4 | 111  | 10069  | 10049              | 10051         | 0.179% | 63.20    | 10051              | 0.179% | 27.43   | <b>10052</b>      | 0.169% | 39.90   |
| 50  | 4 | 116  | 11552  | 11520              | 11523         | 0.251% | 54.40    | 11523              | 0.251% | 26.05   | 11523             | 0.252% | 27.00   |
| 50  | 4 | 121  | 23792  | 23769              | 23775         | 0.071% | 58.50    | 23775              | 0.071% | 34.82   | 23775             | 0.072% | 49.00   |
| 100 | 2 | 1    | 3339   | 3314               | 3322          | 0.509% | 814.60   | 3317               | 0.659% | 273.99  | <b>3339</b>       |        | 285.80  |
| 100 | 2 | 6    | 30665  | 30644              | 30665         |        | 328.10   | 30665              |        | 502.72  | 30665             |        | 200.10  |
| 100 | 2 | 11   | 93894  | 93894              | 93894         |        | 17.20    | 93894              |        | 0.00    | 93894             |        | 40.10   |
| 100 | 2 | 16   | 209100 | 209062             | 209100        |        | 5086.70  | 209100             |        | 362.96  | 209100            |        | 86.90   |
| 100 | 2 | 21   | 457836 | 457814             | 457836        |        | 24.30    | 457836             |        | 131.59  | 457836            |        | 215.10  |
| 100 | 2 | 31   | 12729  | 12725              | 12729         |        | 210.50   | 12729              |        | 101.87  | 12729             |        | 104.10  |
| 100 | 2 | 36   | 56671  | 56576              | 56590         | 0.143% | 804.70   | 56604              | 0.118% | 1352.29 | <b>56671</b>      |        | 347.60  |
| 100 | 2 | 41   | 237964 | 237773             | 237841        | 0.052% | 19685.20 | 237858             | 0.045% | 4597.80 | <b>237884</b>     | 0.034% | 2201.70 |
| 100 | 2 | 46   | 422831 | 422804             | 422830        | 0.000% | 1525.30  | 422827             | 0.001% | 1034.05 | <b>422831</b>     |        | 171.90  |
| 100 | 2 | 56   | 5047   | 4983               | 5047          |        | 796.90   | 4996               | 1.011% | 366.49  | 5047              |        | 152.40  |
| 100 | 2 | 61   | 45573  | 45424              | 45481         | 0.202% | 6818.20  | 45473              | 0.219% | 2369.51 | <b>45573</b>      |        | 275.50  |
| 100 | 2 | 66   | 126513 | 126408             | 126477        | 0.028% | 6969.70  | 126475             | 0.030% | 5139.77 | <b>126503</b>     | 0.008% | 1976.30 |
| 100 | 2 | 71   | 327305 | 327300             | 327305        |        | 3.10     | 327305             |        | 5.77    | 327305            |        | 57.60   |
| 100 | 2 | 81   | 908    | 792                | 830           | 8.590% | 968.90   | 856                | 5.727% | 1959.78 | <b>908</b>        |        | 198.90  |
| 100 | 2 | 86   | 36581  | 36218              | 36322         | 0.708% | 3234.00  | 36316              | 0.724% | 3998.60 | <b>36581</b>      |        | 262.80  |
| 100 | 2 | 91   | 129929 | 129619             | 129752        | 0.136% | 3617.10  | 129766             | 0.125% | 9699.51 | <b>129804</b>     | 0.096% | 6258.50 |
| 100 | 2 | 96   | 254194 | 254141             | 254194        |        | 400.20   | 254194             |        | 1144.89 | 254194            |        | 185.90  |
| 100 | 2 | 111  | 84220  | 84005              | 84097         | 0.146% | 6578.00  | 84097              | 0.146% | 8333.18 | <b>84220</b>      |        | 219.50  |
| 100 | 2 | 116  | 191186 | 191085             | 191173        | 0.007% | 11118.60 | 191170             | 0.008% | 4350.81 | <b>191186</b>     |        | 2373.00 |
| 100 | 2 | 121  | 242018 | 241954             | 241997        | 0.009% | 56938.90 | 241996             | 0.009% | 5195.25 | <b>242018</b>     |        | 181.10  |
| 100 | 4 | 1    | 2001   | 1990               | 2001          |        | 668.10   | 1993               | 0.400% | 724.78  | 2001              |        | 156.10  |
| 100 | 4 | 11   | 50232  | 50199              | 50203         | 0.058% | 951.30   | 50203              | 0.058% | 500.44  | 50203             | 0.058% | 315.40  |
| 100 | 4 | 16   | 110219 | 110114             | 110118        | 0.092% | 950.60   | 110116             | 0.093% | 309.06  | <b>110120</b>     | 0.090% | 249.50  |
| 100 | 4 | 21   | 237392 | 237389             | 237390        | 0.001% | 1047.80  | 237388             | 0.002% | 548.77  | <b>237391</b>     | 0.000% | 375.80  |
| 100 | 4 | 31   | 7130   | 7080               | 7082          | 0.673% | 1156.70  | 7082               | 0.673% | 362.58  | 7082              | 0.678% | 311.20  |
| 100 | 4 | 36   | 30791  | 30773              | <b>30783</b>  | 0.026% | 1654.20  | 30782              | 0.029% | 512.14  | 30782             | 0.029% | 427.90  |
| 100 | 4 | 41   | 126185 | 126130             | 126144        | 0.032% | 923.40   | 126146             | 0.031% | 2518.48 | <b>126147</b>     | 0.030% | 1376.40 |
| 100 | 4 | 46   | 219536 | 219526             | 219529        | 0.003% | 910.00   | 219529             | 0.003% | 724.20  | 219529            | 0.003% | 578.30  |
| 100 | 4 | 56   | 3076   | 3021               | 3030          | 1.495% | 1102.50  | 3030               | 1.495% | 655.17  | 3030              | 1.518% | 586.30  |
| 100 | 4 | 61   | 24856  | 24806              | 24821         | 0.141% | 1094.90  | 24820              | 0.145% | 656.88  | <b>24825</b>      | 0.125% | 548.80  |
| 100 | 4 | 66   | 67970  | 67948              | 67954         | 0.024% | 819.70   | 67955              | 0.022% | 919.41  | 67955             | 0.022% | 723.00  |
| 100 | 4 | 71   | 170691 | 170674             | 170675        | 0.009% | 398.80   | 170674             | 0.010% | 381.42  | 170675            | 0.009% | 568.40  |
| 100 | 4 | 81   | 819    | 754                | 772           | 5.739% | 1242.50  | 769                | 6.105% | 740.06  | <b>784</b>        | 4.464% | 466.10  |
| 100 | 4 | 86   | 21286  | 21209              | 21218         | 0.319% | 798.60   | 21220              | 0.310% | 717.18  | 21220             | 0.311% | 823.80  |
| 100 | 4 | 91   | 70608  | 70582              | <b>70589</b>  | 0.027% | 1640.70  | 70587              | 0.030% | 567.63  | 70588             | 0.028% | 1269.80 |
| 100 | 4 | 96   | 133587 | 133572             | 133575        | 0.009% | 443.80   | 133574             | 0.010% | 457.02  | 133575            | 0.009% | 1028.70 |
| 100 | 4 | 111  | 46719  | 46616              | 46630         | 0.191% | 1094.30  | 46631              | 0.188% | 584.21  | <b>46633</b>      | 0.184% | 957.10  |
| 100 | 4 | 116  | 101551 | 101514             | 101520        | 0.031% | 871.70   | 101520             | 0.031% | 413.25  | <b>101521</b>     | 0.030% | 790.40  |
| 100 | 4 | 121  | 127619 | 127593             | 127597        | 0.017% | 926.70   | 127597             | 0.017% | 1051.62 | <b>127598</b>     | 0.016% | 904.90  |

Table B1: Comparison of Alternative Time-Indexed Formulations

| n   | m | Inst | 1 <sup>st</sup> LP Time(s) |                 |             |         | MIP Time (s) |               |                |             |
|-----|---|------|----------------------------|-----------------|-------------|---------|--------------|---------------|----------------|-------------|
|     |   |      | Cy                         | Fy              | Cz          | Fz      | Cy           | Fy            | Cz             | Fz          |
| 40  | 2 | 66   | 2.03                       | <b>1.01</b>     | 2.71        | 36.01   | 798.67       | <b>161.91</b> | 180.48         | 655.83      |
| 40  | 4 | 31   | 0.84                       | <b>0.35</b>     | 0.87        | 22.78   | $\geq 3600$  | 370.62        | <b>31.45</b>   | 196.45      |
| 40  | 4 | 36   | 0.79                       | <b>0.57</b>     | 0.81        | 5.69    | 406.71       | 283.05        | <b>12.14</b>   | 28.19       |
| 40  | 4 | 41   | 0.65                       | <b>0.58</b>     | 0.99        | 7.57    | 111.60       | 31.11         | <b>19.84</b>   | 41.58       |
| 40  | 4 | 56   | 1.30                       | <b>0.32</b>     | 2.24        | 9.75    | 41.84        | <b>7.33</b>   | 137.12         | 190.69      |
| 40  | 4 | 61   | 0.22                       | <b>0.21</b>     | 0.49        | 2.72    | 45.04        | 11.47         | <b>5.41</b>    | 14.11       |
| 40  | 4 | 81   | 0.05                       | <b>0.02</b>     | 0.06        | 0.13    | 0.04         | <b>0.03</b>   | 0.21           | 0.12        |
| 40  | 4 | 91   | 0.05                       | <b>0.01</b>     | 0.02        | 0.03    | 0.26         | 0.16          | <b>0.12</b>    | 0.27        |
| 40  | 4 | 111  | 0.31                       | <b>0.26</b>     | 0.50        | 3.51    | 26.07        | 6.40          | <b>6.22</b>    | 7.69        |
| 40  | 4 | 116  | 0.30                       | <b>0.11</b>     | 0.34        | 1.74    | 19.10        | <b>3.60</b>   | 4.29           | 9.24        |
| 40  | 4 | 121  | 0.30                       | <b>0.09</b>     | 0.25        | 0.62    | 2.89         | 1.92          | 1.38           | <b>1.30</b> |
| 50  | 4 | 6    | 3.13                       | <b>1.08</b>     | 1.93        | 93.73   | $\geq 3600$  | 407.15        | <b>15.59</b>   | 171.26      |
| 50  | 4 | 11   | 0.91                       | <b>0.19</b>     | 0.47        | 3.27    | 18.30        | <b>6.02</b>   | 11.62          | 10.38       |
| 50  | 4 | 41   | 2.44                       | <b>0.83</b>     | 1.08        | 8.54    | 104.60       | <b>9.00</b>   | 26.03          | 25.75       |
| 50  | 4 | 46   | 0.04                       | <b>&lt;0.01</b> | 0.01        | 0.04    | 0.16         | <b>0.02</b>   | 0.06           | 0.04        |
| 50  | 4 | 56   | 3.12                       | <b>1.38</b>     | 9.80        | 146.49  | $\geq 3600$  | $\geq 3600$   | <b>1757.61</b> | $\geq 3600$ |
| 50  | 4 | 61   | 1.89                       | 1.32            | <b>1.08</b> | 31.59   | $\geq 3600$  | $\geq 3600$   | <b>653.57</b>  | 1171.95     |
| 50  | 4 | 71   | 1.18                       | <b>0.61</b>     | 0.94        | 10.04   | 17.53        | <b>2.88</b>   | 17.51          | 25.67       |
| 50  | 4 | 86   | 0.72                       | <b>0.23</b>     | 0.36        | 3.53    | 100.68       | 59.15         | <b>10.36</b>   | 10.87       |
| 50  | 4 | 96   | 0.84                       | 0.35            | <b>0.34</b> | 2.49    | 46.88        | <b>15.97</b>  | 16.65          | 49.62       |
| 50  | 4 | 111  | 0.33                       | <b>0.14</b>     | 0.30        | 1.72    | 5.79         | <b>2.19</b>   | 4.12           | 8.54        |
| 50  | 4 | 116  | 0.54                       | <b>0.25</b>     | 1.05        | 5.82    | 2644.23      | 1033.20       | <b>217.34</b>  | 467.90      |
| 50  | 4 | 121  | 1.11                       | <b>0.68</b>     | 0.96        | 12.62   | 109.73       | 63.73         | <b>15.99</b>   | 23.71       |
| 100 | 2 | 41   | 114.36                     | <b>72.24</b>    | 93.83       | 6429.75 | $\geq 3600$  | $\geq 3600$   | $\geq 3600$    | $\geq 3600$ |

Table B1: continued

| n   | m | Inst | 1 <sup>st</sup> LP Time(s) |              |              |         | MIP Time (s) |               |                |               |
|-----|---|------|----------------------------|--------------|--------------|---------|--------------|---------------|----------------|---------------|
|     |   |      | Cy                         | Fy           | Cz           | Fz      | Cy           | Fy            | Cz             | Fz            |
| 100 | 2 | 66   | 14.92                      | <b>6.94</b>  | 7.59         | 198.42  | $\geq 3600$  | 1835.84       | <b>605.78</b>  | 2958.81       |
| 100 | 2 | 91   | 96.38                      | <b>73.22</b> | 198.79       | 3088.84 | $\geq 3600$  | $\geq 3600$   | $\geq 3600$    | $\geq 3600$   |
| 100 | 4 | 11   | <b>32.24</b>               | 34.88        | 54.41        | 1571.94 | $\geq 3600$  | $\geq 3600$   | $\geq 3600$    | $\geq 3600$   |
| 100 | 4 | 16   | 73.86                      | 55.26        | <b>46.72</b> | 1072.26 | $\geq 3600$  | $\geq 3600$   | $\geq 3600$    | $\geq 3600$   |
| 100 | 4 | 21   | 30.32                      | 3.04         | <b>2.00</b>  | 109.52  | 8.37         | <b>0.92</b>   | 2.52           | 38.28         |
| 100 | 4 | 31   | <b>30.00</b>               | 118.63       | 803.14       | 2314.03 | $\geq 3600$  | $\geq 3600$   | $\geq 3600$    | $\geq 3600$   |
| 100 | 4 | 36   | 19.04                      | <b>11.30</b> | 43.85        | 570.91  | $\geq 3600$  | $\geq 3600$   | <b>610.22</b>  | $\geq 3600$   |
| 100 | 4 | 41   | 42.75                      | <b>29.76</b> | 32.70        | 603.60  | 3019.47      | <b>299.67</b> | 1617.61        | 2749.60       |
| 100 | 4 | 46   | 15.94                      | 10.76        | <b>4.39</b>  | 69.70   | 81.13        | 40.73         | <b>23.83</b>   | 189.39        |
| 100 | 4 | 56   | <b>53.09</b>               | 90.65        | 775.33       | 6540.45 | $\geq 3600$  | $\geq 3600$   | $\geq 3600$    | $\geq 3600$   |
| 100 | 4 | 61   | 11.63                      | <b>10.05</b> | 14.11        | 242.97  | $\geq 3600$  | $\geq 3600$   | <b>1537.80</b> | $\geq 3600$   |
| 100 | 4 | 66   | 18.66                      | <b>8.30</b>  | 12.55        | 165.54  | 1023.58      | <b>214.09</b> | 483.20         | 1412.99       |
| 100 | 4 | 71   | 35.73                      | <b>9.94</b>  | 18.82        | 227.95  | $\geq 3600$  | <b>488.18</b> | $\geq 3600$    | $\geq 3600$   |
| 100 | 4 | 81   | <b>19.81</b>               | 19.91        | 127.50       | 599.83  | $\geq 3600$  | $\geq 3600$   | $\geq 3600$    | $\geq 3600$   |
| 100 | 4 | 86   | 16.03                      | <b>8.02</b>  | 28.11        | 239.84  | $\geq 3600$  | $\geq 3600$   | $\geq 3600$    | $\geq 3600$   |
| 100 | 4 | 91   | 15.75                      | <b>6.03</b>  | 16.21        | 67.08   | 2245.20      | 485.18        | 401.22         | <b>298.60</b> |
| 100 | 4 | 96   | 17.23                      | 5.35         | <b>4.99</b>  | 166.46  | 940.15       | <b>95.42</b>  | 122.28         | 282.37        |
| 100 | 4 | 111  | 26.33                      | <b>6.53</b>  | 31.93        | 245.29  | $\geq 3600$  | $\geq 3600$   | $\geq 3600$    | $\geq 3600$   |
| 100 | 4 | 116  | 15.00                      | <b>5.30</b>  | 31.04        | 60.67   | $\geq 3600$  | $\geq 3600$   | $\geq 3600$    | $\geq 3600$   |
| 100 | 4 | 121  | 23.88                      | <b>5.43</b>  | 12.36        | 246.66  | $\geq 3600$  | $\geq 3600$   | <b>815.18</b>  | $\geq 3600$   |

Table B2: Effect of Variable Fixation in the Cz Time-  
Index Formulation

| n   | m | Inst | Root Gap |          | 1 <sup>st</sup> LP Time (s) |          | MIP Time (s) |             |
|-----|---|------|----------|----------|-----------------------------|----------|--------------|-------------|
|     |   |      | Fix.     | w/o Fix. | Fix.                        | w/o Fix. | Fix.         | w/o Fix.    |
| 40  | 2 | 66   | 0.480%   | 0.499%   | 2.59                        | 248.26   | 109.68       | $\geq 3600$ |
| 40  | 4 | 31   | 1.485%   | 1.485%   | 0.75                        | 40.95    | 19.97        | 2418.44     |
| 40  | 4 | 36   | 1.049%   | 1.073%   | 0.76                        | 42.63    | 21.37        | 1630.34     |
| 40  | 4 | 41   | 0.316%   | 0.342%   | 0.61                        | 54.26    | 3.23         | 348.15      |
| 40  | 4 | 56   | 3.487%   | 3.487%   | 2.11                        | 38.67    | 19.69        | $\geq 3600$ |
| 40  | 4 | 61   | 0.513%   | 0.710%   | 0.76                        | 31.84    | 9.46         | 1442.72     |
| 40  | 4 | 81   | 2.117%   | 4.796%   | 0.04                        | 107.80   | 0.12         | 348.03      |
| 40  | 4 | 91   | 0.083%   | 0.191%   | 0.02                        | 44.28    | 0.06         | 175.97      |
| 40  | 4 | 111  | 0.685%   | 0.736%   | 0.72                        | 51.04    | 15.05        | 2251.39     |
| 40  | 4 | 116  | 0.245%   | 0.265%   | 0.23                        | 25.68    | 2.31         | 1062.55     |
| 40  | 4 | 121  | 0.045%   | 0.045%   | 0.17                        | 13.06    | 1.12         | 98.50       |
| 50  | 4 | 6    | 0.239%   | 0.239%   | 3.28                        | 184.80   | 10.74        | $\geq 3600$ |
| 50  | 4 | 11   | 0.069%   | 0.070%   | 0.53                        | 125.02   | 4.58         | 1331.04     |
| 50  | 4 | 41   | 0.112%   | 0.120%   | 0.70                        | 99.44    | 7.05         | 854.78      |
| 50  | 4 | 46   | 0.007%   | 0.009%   | 0.01                        | 21.12    | 0.04         | 18.10       |
| 50  | 4 | 56   | 5.678%   | 5.678%   | 9.08                        | 125.55   | 547.65       | $\geq 3600$ |
| 50  | 4 | 61   | 0.776%   | 0.776%   | 1.03                        | 272.35   | 854.85       | $\geq 3600$ |
| 50  | 4 | 71   | 0.056%   | 0.062%   | 0.82                        | 39.84    | 12.79        | 465.97      |
| 50  | 4 | 86   | 0.561%   | 0.848%   | 0.53                        | 154.74   | 6.20         | 1014.25     |
| 50  | 4 | 96   | 0.036%   | 0.036%   | 0.50                        | 34.59    | 12.24        | 412.73      |
| 50  | 4 | 111  | 0.277%   | 0.289%   | 0.43                        | 203.12   | 5.18         | 2715.11     |
| 50  | 4 | 116  | 0.342%   | 0.353%   | 0.64                        | 71.30    | 1101.00      | $\geq 3600$ |
| 50  | 4 | 121  | 0.118%   | 0.118%   | 0.92                        | 69.34    | 14.24        | 509.27      |
| 100 | 2 | 41   | 0.096%   | 0.096%   | 128.67                      | 8597.65  | $\geq 3600$  | $\geq 3600$ |

Table B2: continued

| n   | m | Inst | Root Gap |          | 1 <sup>st</sup> LP Time (s) |          | MIP Time (s) |          |
|-----|---|------|----------|----------|-----------------------------|----------|--------------|----------|
|     |   |      | Fix.     | w/o Fix. | Fix.                        | w/o Fix. | Fix.         | w/o Fix. |
| 100 | 2 | 66   | 0.105%   | 0.110%   | 10.67                       | 6186.86  | 2267.02      | ≥3600    |
| 100 | 2 | 91   | 0.287%   | 0.289%   | 203.85                      | 8342.06  | ≥3600        | ≥3600    |
| 100 | 4 | 11   | 0.076%   | 0.076%   | 38.98                       | 1537.35  | ≥3600        | ≥3600    |
| 100 | 4 | 16   | 0.106%   | 0.107%   | 56.98                       | 1014.23  | ≥3600        | ≥3600    |
| 100 | 4 | 21   | 0.002%   | 0.002%   | 2.79                        | 275.85   | 1.18         | 271.68   |
| 100 | 4 | 31   | 0.701%   | 0.701%   | 856.73                      | 1392.17  | ≥3600        | ≥3600    |
| 100 | 4 | 36   | 0.061%   | 0.061%   | 32.25                       | 1608.79  | 556.24       | ≥3600    |
| 100 | 4 | 41   | 0.047%   | 0.049%   | 31.69                       | 1709.76  | 2626.01      | ≥3600    |
| 100 | 4 | 46   | 0.005%   | 0.005%   | 5.31                        | 467.65   | 237.06       | 1745.52  |
| 100 | 4 | 56   | 1.790%   | 1.790%   | 677.43                      | 1510.31  | ≥3600        | ≥3600    |
| 100 | 4 | 61   | 0.248%   | 0.248%   | 4.97                        | 1706.10  | 1653.76      | ≥3600    |
| 100 | 4 | 66   | 0.048%   | 0.049%   | 9.40                        | 810.20   | 1778.90      | ≥3600    |
| 100 | 4 | 71   | 0.009%   | 0.012%   | 20.86                       | 577.71   | ≥3600        | ≥3600    |
| 100 | 4 | 81   | 7.997%   | 7.997%   | 115.28                      | 1357.05  | 2657.21      | ≥3600    |
| 100 | 4 | 86   | 0.499%   | 0.499%   | 38.87                       | 2271.43  | ≥3600        | ≥3600    |
| 100 | 4 | 91   | 0.048%   | 0.049%   | 5.01                        | 1421.21  | 499.05       | ≥3600    |
| 100 | 4 | 96   | 0.020%   | 0.020%   | 10.83                       | 675.04   | 59.06        | ≥3600    |
| 100 | 4 | 111  | 0.239%   | 0.241%   | 41.39                       | 2014.67  | ≥3600        | ≥3600    |
| 100 | 4 | 116  | 0.040%   | 0.042%   | 18.67                       | 610.95   | ≥3600        | ≥3600    |
| 100 | 4 | 121  | 0.022%   | 0.022%   | 10.18                       | 1259.12  | 1962.12      | ≥3600    |

Table B3: Effect of Projected Cuts in the Cz Time-Indexed Formulation

| n  | m | Inst | Heu UB | ATIF    |          | TIF                   |                        |         |          |             |
|----|---|------|--------|---------|----------|-----------------------|------------------------|---------|----------|-------------|
|    |   |      |        | Root LB | Root Gap | 1 <sup>st</sup> LP LB | 1 <sup>st</sup> LP Gap | Root LB | Root Gap | Gap Improv. |
| 40 | 2 | 66   | 35279  | 35233   | 0.130%   | 35110                 | 0.481%                 | 35131   | 0.421%   | 14.26%      |
| 40 | 4 | 31   | 2525   | 2507    | 0.713%   | 2488                  | 1.487%                 | 2496    | 1.162%   | 28.00%      |
| 40 | 4 | 36   | 6420   | 6367    | 0.826%   | 6353                  | 1.055%                 | 6355    | 1.023%   | 3.11%       |

Table B3: continued

| n   | m | Inst | Heu UB | ATIF    |          | TIF                   |                        | Root LB | Root Gap | Gap Improv. |
|-----|---|------|--------|---------|----------|-----------------------|------------------------|---------|----------|-------------|
|     |   |      |        | Root LB | Root Gap | 1 <sup>st</sup> LP LB | 1 <sup>st</sup> LP Gap |         |          |             |
| 40  | 4 | 41   | 17685  | 17639   | 0.260%   | 17630                 | 0.312%                 | 17634   | 0.289%   | 7.87%       |
| 40  | 4 | 56   | 826    | 815     | 1.332%   | 798                   | 3.509%                 | 798     | 3.509%   | 0.00%       |
| 40  | 4 | 61   | 7357   | 7327    | 0.408%   | 7320                  | 0.505%                 | 7324    | 0.451%   | 12.18%      |
| 40  | 4 | 81   | 564    | 560     | 0.709%   | 553                   | 1.989%                 | 553     | 1.989%   | 0.00%       |
| 40  | 4 | 91   | 15569  | 15562   | 0.045%   | 15557                 | 0.077%                 | 15559   | 0.064%   | 20.02%      |
| 40  | 4 | 111  | 11263  | 11222   | 0.364%   | 11186                 | 0.688%                 | 11212   | 0.455%   | 51.33%      |
| 40  | 4 | 116  | 15566  | 15547   | 0.122%   | 15528                 | 0.245%                 | 15539   | 0.174%   | 40.84%      |
| 40  | 4 | 121  | 35751  | 35741   | 0.028%   | 35735                 | 0.045%                 | 35739   | 0.034%   | 33.35%      |
| 50  | 4 | 6    | 8317   | 8304    | 0.156%   | 8298                  | 0.229%                 | 8298    | 0.229%   | 0.00%       |
| 50  | 4 | 11   | 12879  | 12876   | 0.023%   | 12871                 | 0.062%                 | 12871   | 0.062%   | 0.00%       |
| 50  | 4 | 41   | 21806  | 21786   | 0.092%   | 21782                 | 0.110%                 | 21783   | 0.106%   | 4.35%       |
| 50  | 4 | 46   | 44455  | 44453   | 0.004%   | 44452                 | 0.007%                 | 44452   | 0.007%   | 0.00%       |
| 50  | 4 | 56   | 570    | 540     | 5.263%   | 538                   | 5.948%                 | 538     | 5.948%   | 0.00%       |
| 50  | 4 | 61   | 7898   | 7857    | 0.519%   | 7837                  | 0.778%                 | 7850    | 0.611%   | 27.29%      |
| 50  | 4 | 71   | 42645  | 42627   | 0.042%   | 42622                 | 0.054%                 | 42625   | 0.047%   | 15.01%      |
| 50  | 4 | 86   | 8369   | 8336    | 0.394%   | 8323                  | 0.553%                 | 8333    | 0.432%   | 27.93%      |
| 50  | 4 | 96   | 50326  | 50325   | 0.002%   | 50308                 | 0.036%                 | 50312   | 0.028%   | 28.58%      |
| 50  | 4 | 111  | 10069  | 10052   | 0.169%   | 10042                 | 0.269%                 | 10049   | 0.199%   | 35.09%      |
| 50  | 4 | 116  | 11552  | 11523   | 0.251%   | 11513                 | 0.339%                 | 11520   | 0.278%   | 21.95%      |
| 50  | 4 | 121  | 23792  | 23775   | 0.071%   | 23764                 | 0.118%                 | 23769   | 0.097%   | 21.76%      |
| 100 | 2 | 41   | 237964 | 237884  | 0.034%   | 237734                | 0.097%                 | 237772  | 0.081%   | 19.81%      |
| 100 | 2 | 66   | 126513 | 126503  | 0.008%   | 126380                | 0.105%                 | 126411  | 0.081%   | 30.42%      |
| 100 | 2 | 91   | 129929 | 129804  | 0.096%   | 129557                | 0.287%                 | 129618  | 0.240%   | 19.67%      |
| 100 | 4 | 11   | 50232  | 50203   | 0.058%   | 50194                 | 0.076%                 | 50198   | 0.068%   | 11.77%      |
| 100 | 4 | 16   | 110219 | 110120  | 0.090%   | 110102                | 0.106%                 | 110113  | 0.096%   | 10.39%      |
| 100 | 4 | 21   | 237392 | 237391  | 0.000%   | 237388                | 0.002%                 | 237388  | 0.002%   | 0.00%       |
| 100 | 4 | 31   | 7130   | 7082    | 0.673%   | 7080                  | 0.706%                 | 7080    | 0.706%   | 0.00%       |
| 100 | 4 | 36   | 30791  | 30782   | 0.029%   | 30773                 | 0.058%                 | 30773   | 0.058%   | 0.00%       |
| 100 | 4 | 41   | 126185 | 126147  | 0.030%   | 126126                | 0.047%                 | 126130  | 0.044%   | 7.28%       |
| 100 | 4 | 46   | 219536 | 219529  | 0.003%   | 219525                | 0.005%                 | 219526  | 0.005%   | 10.00%      |
| 100 | 4 | 56   | 3076   | 3030    | 1.495%   | 3021                  | 1.821%                 | 3021    | 1.821%   | 0.00%       |
| 100 | 4 | 61   | 24856  | 24825   | 0.125%   | 24795                 | 0.246%                 | 24806   | 0.202%   | 22.05%      |
| 100 | 4 | 66   | 67970  | 67955   | 0.018%   | 67938                 | 0.047%                 | 67947   | 0.034%   | 39.15%      |
| 100 | 4 | 71   | 170691 | 170675  | 0.009%   | 170675                | 0.009%                 | 170678  | 0.008%   | 23.08%      |
| 100 | 4 | 81   | 819    | 784     | 2.686%   | 754                   | 8.621%                 | 754     | 8.621%   | 0.00%       |
| 100 | 4 | 86   | 21286  | 21220   | 0.310%   | 21180                 | 0.500%                 | 21208   | 0.368%   | 36.08%      |
| 100 | 4 | 91   | 70608  | 70588   | 0.025%   | 70575                 | 0.047%                 | 70582   | 0.037%   | 26.94%      |
| 100 | 4 | 96   | 133587 | 133575  | 0.009%   | 133561                | 0.019%                 | 133572  | 0.011%   | 73.35%      |
| 100 | 4 | 111  | 46719  | 46633   | 0.184%   | 46608                 | 0.238%                 | 46615   | 0.223%   | 6.75%       |
| 100 | 4 | 116  | 101551 | 101521  | 0.025%   | 101510                | 0.040%                 | 101513  | 0.037%   | 7.90%       |
| 100 | 4 | 121  | 127619 | 127598  | 0.016%   | 127590                | 0.023%                 | 127592  | 0.021%   | 7.41%       |

Table C1: Detailed Results for  $m = 2$  and  $n = 40$  instances

| BCP-PMWT |       | BCP-PMWT-OTI |       |        |        |              |       |      |        |         |              |       |      |       |       |
|----------|-------|--------------|-------|--------|--------|--------------|-------|------|--------|---------|--------------|-------|------|-------|-------|
|          |       | BCP          |       |        |        | CPLEX        |       |      |        | Overall |              |       |      |       |       |
|          |       | Inst         | UB    | LB     | Time   | Time         | Time  | Opt  | Best   | Time    | Time         | Time  | Opt  |       |       |
|          |       | Root         |       |        |        | Root         |       |      |        | Root    |              |       |      |       |       |
|          |       | UB           | LB    | Time   | Time   | Time         | Opt   | Best | Time   | Time    | Time         | Opt   | Best | Time  | Opt   |
| 1        | 606   | 606          | 80.9  | 80.9   | 606    | 606          | 606   | Root | 80.9   | 606     | 606          | 21.9  | Root | 21.9  | 606   |
| 6        | 3886  | 3886         | 27.7  | 27.7   | 3886   | 3886         | 3886  | Root | 27.7   | 3886    | 3886         | 6.7   | Root | 6.7   | 3886  |
| 11       | 9617  | 9617         | 22.3  | 22.3   | 9617   | 9617         | 9617  | Root | 22.3   | 9617    | 9617         | 5.1   | Root | 5.1   | 9617  |
| 16       | 38356 | 38356        | 59.1  | 59.1   | 38356  | 38356        | 38356 | Root | 59.1   | 38356   | 38356        | 32.5  | Root | 32.5  | 38356 |
| 31       | 3812  | 3812         | 49.2  | 49.2   | 3812   | 3812         | 3812  | Root | 49.2   | 3812    | 3812         | 5.8   | Root | 5.8   | 3812  |
| 36       | 10713 | 10713        | 65.7  | 65.7   | 10713  | 10713        | 10713 | Root | 65.7   | 10713   | 10713        | 8.1   | Root | 8.1   | 10713 |
| 56       | 1279  | 1279         | 24.3  | 24.3   | 1279   | 1279         | 1279  | Root | 24.3   | 1279    | 1279         | 5.7   | Root | 5.7   | 1279  |
| 61       | 11488 | 11394        | 705.7 | 2398.5 | 1994.0 | 11488        | 11488 | MIP  | 2699.7 | 11488   | <b>11488</b> | 11.1  | Root | 11.1  | 11488 |
| 66       | 35279 | 35197        | 220.4 | 307.8  | 1776.0 | 35279        | 35279 | BCP  | 528.2  | 35279   | <b>35233</b> | 556.1 | MIP  | 736.6 | 35279 |
| 71       | 47952 | 47952        | 15.6  | 15.6   | 47952  | 47952        | 47952 | Root | 15.6   | 47952   | 47952        | 6.5   | Root | 6.5   | 47952 |
| 81       | 573   | 571          | 83.7  | 83.7   | 571    | 571          | 571   | Root | 83.7   | 571     | <b>571</b>   | 18.5  | Root | 18.5  | 571   |
| 86       | 6048  | 6048         | 46.2  | 46.2   | 6048   | 6048         | 6048  | Root | 46.2   | 6048    | 6048         | 5.2   | Root | 5.2   | 6048  |
| 96       | 66116 | 66116        | 22.8  | 22.8   | 66116  | 66116        | 66116 | Root | 22.8   | 66116   | 66116        | 4.3   | Root | 4.3   | 66116 |
| 111      | 17936 | 17936        | 28.1  | 28.1   | 17936  | 17936        | 17936 | Root | 28.1   | 17936   | 17936        | 6.0   | Root | 6.0   | 17936 |
| 116      | 25874 | 25870        | 66.6  | 66.6   | 25870  | <b>25870</b> | 25870 | Root | 66.6   | 25870   | <b>25870</b> | 9.8   | Root | 9.8   | 25870 |
| 121      | 64516 | 64516        | 24.3  | 24.3   | 64516  | 64516        | 64516 | Root | 24.3   | 64516   | 64516        | 4.4   | Root | 4.4   | 64516 |

Table C2: Detailed Results for  $m = 4$  and  $n = 40$  instances

| BCP-PMWT |       | BCP-PMWT-OTI |      |         |         |       |       |                                                                                                      |        |         |              |      |      |       |       |
|----------|-------|--------------|------|---------|---------|-------|-------|------------------------------------------------------------------------------------------------------|--------|---------|--------------|------|------|-------|-------|
|          |       | BCP          |      |         |         | CPLEX |       |                                                                                                      |        | Overall |              |      |      |       |       |
|          |       | Inst         | UB   | LB      | Time    | Time  | Time  | Opt                                                                                                  | Best   | Time    | Time         | Time | Opt  |       |       |
|          |       | Root         |      |         |         | Root  |       |                                                                                                      |        | Root    |              |      |      |       |       |
|          |       | UB           | LB   | Time    | Time    | Time  | Opt   | Best <td>Time</td> <td>Time</td> <td>Time</td> <td>Opt</td> <td>Best</td> <td>Time</td> <td>Opt</td> | Time   | Time    | Time         | Opt  | Best | Time  | Opt   |
| 1        | 439   | 439          | 11.4 | 11.4    | 439     | 439   | 439   | Root                                                                                                 | 11.4   | 439     | 439          | 3.9  | Root | 3.9   | 439   |
| 6        | 2374  | 2374         | 11.1 | 11.1    | 2374    | 2374  | 2374  | Root                                                                                                 | 11.1   | 2374    | 2374         | 3.7  | Root | 3.7   | 2374  |
| 11       | 5737  | 5737         | 10.3 | 10.3    | 5737    | 5737  | 5737  | Root                                                                                                 | 10.3   | 5737    | 5737         | 3.2  | Root | 3.2   | 5737  |
| 16       | 21493 | 21490        | 30.4 | 30.4    | 21493   | 21493 | 21493 | Root                                                                                                 | 30.4   | 21493   | <b>21493</b> | 24.5 | Root | 24.5  | 21493 |
| 31       | 2525  | 2500         | 50.1 | 2932.6  | 12172.3 | 2525  | 2525  | BCP                                                                                                  | 2982.7 | 2525    | <b>2507</b>  | 29.7 | MIP  | 61.2  | 2525  |
| 36       | 6420  | 6364         | 37.3 | 18799.5 | 2829.7  | 6420  | 6420  | MIP                                                                                                  | 2867.0 | 6420    | <b>6367</b>  | 16.4 | MIP  | 28.5  | 6420  |
| 41       | 17685 | 17637        | 36.1 | 1856.0  | 128.0   | 17685 | 17685 | MIP                                                                                                  | 164.1  | 17685   | <b>17639</b> | 14.1 | MIP  | 33.9  | 17685 |
| 56       | 826   | <b>817</b>   | 54.6 | >86400  | 878.0   | 826   | 826   | MIP                                                                                                  | 932.6  | 826     | 815          | 29.5 | MIP  | 166.6 | 826   |
| 61       | 7357  | 7322         | 33.8 | 230.2   | 143.0   | 7357  | 7357  | MIP                                                                                                  | 176.8  | 7357    | <b>7327</b>  | 40.1 | MIP  | 45.5  | 7357  |

Table C2: Detailed Results for  $m = 4$  and  $n = 40$  instances

| BCP-PMWT |       |       |      |      |        |       |               |       |       |              |       |       |      |      |      |       |
|----------|-------|-------|------|------|--------|-------|---------------|-------|-------|--------------|-------|-------|------|------|------|-------|
| Inst     | Root  |       |      | BCP  |        |       | CPLEX Overall |       |       | BCP-PMWT-OTI |       |       |      |      |      |       |
|          | UB    | LB    | Time | Time | Time   | Opt   | Best          | Time  | Opt   | UB           | LB    | Time  | Time | Best | Time | Opt   |
| 66       | 20251 | 20251 | 12.9 | 46.4 | 9.7    | 12.9  | Root          | 20251 | 20251 | 20251        | 20251 | 2.9   | 0.4  | Root | 2.9  | 20251 |
| 81       | 565   | 560   | 46.4 | 15.3 | 9.7    | 47.3  | MIP           | 564   | 564   | 560          | 19.6  | 0.4   | 0.21 | BCP  | 20.0 | 564   |
| 86       | 4725  | 4725  | 15.3 | 39.4 | 9.6    | 15.3  | Root          | 4725  | 4725  | 4725         | 6.1   | 0.6   | 0.12 | Root | 6.1  | 4725  |
| 91       | 15569 | 15562 | 39.4 | 72.0 | 303.9  | 40.1  | MIP           | 15569 | 15569 | 15562        | 17.9  | 0.6   | 0.12 | BCP  | 18.5 | 15569 |
| 111      | 11263 | 11219 | 72.0 | 31.3 | 101.4  | 177.3 | MIP           | 11263 | 11263 | <b>11222</b> | 17.3  | 148.8 | 6.22 | MIP  | 23.5 | 11263 |
| 116      | 15566 | 15545 | 31.3 | 52.0 | 42.6   | 71.7  | MIP           | 15566 | 15566 | <b>15547</b> | 19.2  | 52.3  | 4.29 | MIP  | 23.5 | 15566 |
| 121      | 35751 | 35741 | 52.0 | 66.6 | 2390.7 | 56.7  | MIP           | 35751 | 35751 | 35741        | 15.6  | 32.7  | 1.38 | MIP  | 17.0 | 35751 |

Table C3: Detailed Results for  $m = 2$  and  $n = 50$  instances

| BCP-PMWT |        |        |        |        |         |         |               |        |        |              |        | BCP-PMWT-OTI |      |      |       |               |        |        |        |        |        |      |      |      |       |        |
|----------|--------|--------|--------|--------|---------|---------|---------------|--------|--------|--------------|--------|--------------|------|------|-------|---------------|--------|--------|--------|--------|--------|------|------|------|-------|--------|
| Inst     | Root   |        |        | BCP    |         |         | CPLEX Overall |        |        | Root         |        |              | BCP  |      |       | CPLEX Overall |        |        |        |        |        |      |      |      |       |        |
|          | UB     | LB     | Time   | Time   | Time    | Opt     | Best          | Time   | Opt    | UB           | LB     | Time         | Time | Best | Time  | Opt           | UB     | LB     | Time   | Time   | Best   | Time | Opt  |      |       |        |
| 1        | 1268   | 1268   | 345.8  | 122.8  | 16.7    | 345.8   | Root          | 1268   | 1268   | 1268         | 1268   | 28.8         | 0.4  | Root | 28.8  | 1268          | 1268   | 1268   | 1268   | 1268   | 1268   | 28.8 | 0.4  | Root | 28.8  | 1268   |
| 6        | 14272  | 14272  | 122.8  | 67.1   | 16.7    | 122.8   | Root          | 14272  | 14272  | 14272        | 14272  | 10.0         | 0.4  | Root | 10.0  | 14272         | 14272  | 14272  | 14272  | 14272  | 14272  | 10.0 | 0.4  | Root | 10.0  | 14272  |
| 11       | 23028  | 23028  | 67.1   | 59.4   | 16.7    | 67.1    | Root          | 23028  | 23028  | 23028        | 23028  | 10.9         | 0.4  | Root | 10.9  | 23028         | 23028  | 23028  | 23028  | 23028  | 23028  | 10.9 | 0.4  | Root | 10.9  | 23028  |
| 16       | 46072  | 46072  | 59.4   | 36.1   | 16.7    | 59.4    | Root          | 46072  | 46072  | 46072        | 46072  | 17.7         | 0.4  | Root | 17.7  | 46072         | 46072  | 46072  | 46072  | 46072  | 46072  | 17.7 | 0.4  | Root | 17.7  | 46072  |
| 21       | 111069 | 111069 | 36.1   | 1110.2 | 2390.7  | 36.1    | Root          | 111069 | 111069 | 111069       | 111069 | 6.8          | 0.4  | Root | 6.8   | 111069        | 111069 | 111069 | 111069 | 111069 | 111069 | 6.8  | 0.4  | Root | 6.8   | 111069 |
| 31       | 5378   | 5349   | 1110.2 | 73.3   | 16.7    | 12719.1 | BCP           | 5378   | 5378   | <b>5378</b>  | 21.1   | 0.4          | Root | 21.1 | 5378  | 5378          | 5378   | 5378   | 5378   | 5378   | 21.1   | 0.4  | Root | 21.1 | 5378  |        |
| 36       | 18956  | 18956  | 73.3   | 381.5  | 16.7    | 73.3    | Root          | 18956  | 18956  | 18956        | 18956  | 9.1          | 0.4  | Root | 9.1   | 18956         | 18956  | 18956  | 18956  | 18956  | 18956  | 9.1  | 0.4  | Root | 9.1   | 18956  |
| 41       | 38058  | 38050  | 381.5  | 66.0   | 16.7    | 398.2   | BCP           | 38058  | 38058  | <b>38058</b> | 58.0   | 0.4          | Root | 58.0 | 38058 | 38058         | 38058  | 38058  | 38058  | 38058  | 58.0   | 0.4  | Root | 58.0 | 38058 |        |
| 46       | 82105  | 82105  | 66.0   | 267.4  | 16.7    | 66.0    | Root          | 82105  | 82105  | 82105        | 31.4   | 0.4          | Root | 31.4 | 82105 | 82105         | 82105  | 82105  | 82105  | 82105  | 31.4   | 0.4  | Root | 31.4 | 82105 |        |
| 56       | 761    | 761    | 267.4  | 661.4  | 83122.8 | 267.4   | Root          | 761    | 761    | 761          | 13.9   | 0.4          | Root | 13.9 | 761   | 761           | 761    | 761    | 761    | 761    | 13.9   | 0.4  | Root | 13.9 | 761   |        |
| 61       | 13682  | 13619  | 661.4  | 37.5   | 83122.8 | 36756.0 | MIP           | 13682  | 13682  | <b>13682</b> | 22.6   | 0.4          | Root | 22.6 | 13682 | 13682         | 13682  | 13682  | 13682  | 13682  | 22.6   | 0.4  | Root | 22.6 | 13682 |        |
| 66       | 40907  | 40907  | 37.5   | 999.3  | 2390.7  | 37.5    | Root          | 40907  | 40907  | 40907        | 6.3    | 0.4          | Root | 6.3  | 40907 | 40907         | 40907  | 40907  | 40907  | 40907  | 6.3    | 0.4  | Root | 6.3  | 40907 |        |
| 81       | 542    | 542    | 40.5   | 552.6  | 210.6   | 40.5    | Root          | 542    | 542    | 542          | 8.9    | 0.4          | Root | 8.9  | 542   | 542           | 542    | 542    | 542    | 542    | 8.9    | 0.4  | Root | 8.9  | 542   |        |
| 86       | 12557  | 12427  | 999.3  | 60.9   | 2390.7  | 14817.0 | BCP           | 12557  | 12557  | <b>12557</b> | 17.8   | 0.4          | Root | 17.8 | 12557 | 12557         | 12557  | 12557  | 12557  | 12557  | 17.8   | 0.4  | Root | 17.8 | 12557 |        |
| 91       | 47349  | 47330  | 552.6  | 60.9   | 210.6   | 757.1   | MIP           | 47349  | 47349  | <b>47349</b> | 8.7    | 0.4          | Root | 8.7  | 47349 | 47349         | 47349  | 47349  | 47349  | 47349  | 8.7    | 0.4  | Root | 8.7  | 47349 |        |
| 96       | 92822  | 92822  | 60.9   | 66.6   | 2390.7  | 60.9    | Root          | 92822  | 92822  | 92822        | 7.3    | 0.4          | Root | 7.3  | 92822 | 92822         | 92822  | 92822  | 92822  | 92822  | 7.3    | 0.4  | Root | 7.3  | 92822 |        |
| 111      | 15564  | 15564  | 66.6   | 508.8  | 2390.7  | 66.6    | Root          | 15564  | 15564  | 15564        | 9.3    | 0.4          | Root | 9.3  | 15564 | 15564         | 15564  | 15564  | 15564  | 15564  | 9.3    | 0.4  | Root | 9.3  | 15564 |        |
| 116      | 19609  | 19573  | 508.8  | 2390.7 | 8539.5  | 2899.5  | BCP           | 19608  | 19608  | <b>19608</b> | 47.1   | 0.4          | Root | 47.1 | 19608 | 19608         | 19608  | 19608  | 19608  | 19608  | 47.1   | 0.4  | Root | 47.1 | 19608 |        |

Table C4: Detailed Results for  $m = 4$  and  $n = 50$  instances

| BCP-PMWT |       |              |       |         |         |       |         |       |      |         |       | BCP-PMWT-OTI |              |        |          |          |         |       |        |        |         |       |         |       |       |
|----------|-------|--------------|-------|---------|---------|-------|---------|-------|------|---------|-------|--------------|--------------|--------|----------|----------|---------|-------|--------|--------|---------|-------|---------|-------|-------|
| Inst     | Root  |              |       | BCP     |         |       | CPLEX   |       |      | Overall |       |              | UB           | Root   |          |          | BCP     |       |        | CPLEX  |         |       | Overall |       |       |
|          | LB    | Time         | Opt   | Time    | Time    | Opt   | Time    | Time  | Opt  | Best    | Time  | Opt          |              | UB     | LB       | Time     | Opt     | Time  | Time   | Opt    | Best    | Time  | Opt     | Best  | Time  |
| 1        | 785   | 56.4         | 785   | 56.4    | 785     | 785   | 56.4    | 785   | Root | 56.4    | 785   | 785          | 785          | 785    | 29.0     | 785      | 29.0    | 785   | Root   | 29.0   | 785     | 29.0  | 785     | 29.0  | 785   |
| 6        | 8317  | 8304         | 147.1 | >86400  | 78140.0 | 8317  | 78287.1 | 8317  | MIP  | 78287.1 | 8317  | 8317         | 8304         | 33.7   | 1330.2   | 1330.2   | 15.59   | BCP   | 1363.9 | 8317   | 15.59   | BCP   | 1363.9  | 8317  |       |
| 11       | 12879 | 12875        | 98.9  | 5691.6  | 43.8    | MIP   | 142.7   | 12879 | MIP  | 142.7   | 12879 | 12879        | <b>12876</b> | 34.6   | 40.2     | 40.2     | 11.62   | MIP   | 46.2   | 12879  | 11.62   | MIP   | 46.2    | 12879 |       |
| 16       | 25376 | 25376        | 31.2  | 31.2    | 25376   | 25376 | 31.2    | 25376 | Root | 31.2    | 25376 | 25376        | 25376        | 9.2    |          |          |         |       | Root   | 9.2    | 25376   | 9.2   | 25376   | 9.2   | 25376 |
| 36       | 10796 | 10796        | 35.1  | 35.1    | 10796   | 10796 | 35.1    | 10796 | Root | 35.1    | 10796 | 10796        | 10796        | 5.6    |          |          |         |       | Root   | 5.6    | 10796   | 5.6   | 10796   | 5.6   | 10796 |
| 41       | 21806 | 21785        | 72.7  | 232.4   | 68.1    | MIP   | 140.8   | 21806 | MIP  | 140.8   | 21806 | 21806        | <b>21786</b> | 59.1   | 179.7    | 179.7    | 26.03   | MIP   | 85.1   | 21806  | 26.03   | MIP   | 85.1    | 21806 |       |
| 46       | 44455 | <b>44455</b> | 40.5  | 40.5    | 44455   | 44455 | 40.5    | 44455 | Root | 40.5    | 44455 | 44455        | 44453        | 17.1   | 0.7      | 0.7      | 0.06    | BCP   | 17.8   | 44455  | 0.06    | BCP   | 17.8    | 44455 |       |
| 56       | 570   | <b>541</b>   | 67.8  | >86400  | 18126.0 | MIP   | 18193.8 | 570   | MIP  | 18193.8 | 570   | 570          | 540          | 14.2   | >14393.6 | >14393.6 | 1757.61 | MIP   | 1771.8 | 570    | 1757.61 | MIP   | 1771.8  | 570   |       |
| 61       | 7898  | 7857         | 113.7 | >86400  | 27997.4 | MIP   | 28111.1 | 7898  | MIP  | 28111.1 | 7898  | 7898         | 7857         | 49.3   | 6283.0   | 6283.0   | 653.57  | MIP   | 702.9  | 7898   | 653.57  | MIP   | 702.9   | 7898  |       |
| 71       | 42645 | <b>42628</b> | 218.8 | 336.6   | 42.3    | MIP   | 261.1   | 42645 | MIP  | 261.1   | 42645 | 42645        | 42627        | 19.0   | 91.3     | 91.3     | 17.51   | MIP   | 36.5   | 42645  | 17.51   | MIP   | 36.5    | 42645 |       |
| 81       | 495   | 495          | 118.9 | 575.2   | 355.6   | MIP   | 596.9   | 8369  | Root | 118.9   | 495   | 495          | 495          | 26.3   |          |          |         |       | Root   | 26.3   | 495     |       |         | 26.3  | 495   |
| 86       | 8369  | 8336         | 241.3 | 575.2   | 355.6   | MIP   | 596.9   | 8369  | MIP  | 596.9   | 8369  | 8369         | 8336         | 69.9   | 130.1    | 130.1    | 10.36   | MIP   | 80.3   | 8369   | 10.36   | MIP   | 80.3    | 8369  |       |
| 91       | 26552 | 26548        | 187.6 | 261.1   | 32.4    | MIP   | 187.6   | 26551 | Root | 187.6   | 26551 | <b>26551</b> | 12.4         |        |          |          |         |       | Root   | 12.4   | 26551   |       |         | 12.4  | 26551 |
| 96       | 50326 | 50317        | 183.2 | 261.1   | 32.4    | MIP   | 215.6   | 50326 | MIP  | 215.6   | 50326 | <b>50325</b> | 77.1         | 59.7   | 59.7     | 16.65    | MIP     | 93.7  | 50326  | 16.65  | MIP     | 93.7  | 50326   |       |       |
| 111      | 10069 | 10051        | 134.6 | 52.0    | 43.8    | MIP   | 178.4   | 10069 | MIP  | 178.4   | 10069 | <b>10052</b> | 39.9         | 46.4   | 46.4     | 4.12     | MIP     | 44.0  | 10069  | 4.12   | MIP     | 44.0  | 10069   |       |       |
| 116      | 11552 | 11523        | 114.3 | 45693.5 | 4087.2  | MIP   | 4201.5  | 11552 | MIP  | 4201.5  | 11552 | 11523        | 27.0         | 7944.5 | 7944.5   | 217.34   | MIP     | 244.3 | 11552  | 217.34 | MIP     | 244.3 | 11552   |       |       |
| 121      | 23792 | 23775        | 85.3  | 438.5   | 248.5   | MIP   | 333.8   | 23792 | MIP  | 333.8   | 23792 | 23775        | 49.0         | 132.0  | 132.0    | 15.99    | MIP     | 65.0  | 23792  | 15.99  | MIP     | 65.0  | 23792   |       |       |

Table C5: Detailed Results for  $m = 2$  and  $n = 100$  instances

| BCP-PMWT  |        |        |         |        |          |        |          |        |      |          |        | BCP-PMWT-OTI  |        |        |        |        |        |        |        |        |        |        |         |        |        |        |
|-----------|--------|--------|---------|--------|----------|--------|----------|--------|------|----------|--------|---------------|--------|--------|--------|--------|--------|--------|--------|--------|--------|--------|---------|--------|--------|--------|
| Inst      | Root   |        |         | BCP    |          |        | CPLEX    |        |      | Overall  |        |               | UB     | Root   |        |        | BCP    |        |        | CPLEX  |        |        | Overall |        |        |        |
|           | LB     | Time   | Opt     | Time   | Time     | Opt    | Time     | Time   | Opt  | Best     | Time   | Opt           |        | UB     | LB     | Time   | Opt    | Time   | Time   | Opt    | Best   | Time   | Opt     | Best   | Time   | Opt    |
| <b>1</b>  | 3339   | 3322   | 1606.0  | >14400 | >14400   | <3339  | 3339     | 3339   | 3339 | >14400   | 3339   | <b>3339</b>   | 285.8  | 285.8  | 285.8  | 285.8  | 285.8  | 285.8  | 285.8  | 285.8  | 285.8  | 285.8  | 285.8   | 285.8  | 285.8  | 3339   |
| 6         | 30665  | 30665  | 1001.5  | 1001.5 | 30665    | 30665  | 1001.5   | 30665  | Root | 1001.5   | 30665  | 30665         | 200.1  | 200.1  | 200.1  | 30665  | 200.1  | 30665  | 30665  | 200.1  | 30665  | 200.1  | 30665   | 200.1  | 30665  | 30665  |
| 11        | 93894  | 93894  | 613.0   | 613.0  | 93894    | 93894  | 613.0    | 93894  | Root | 613.0    | 93894  | 93894         | 40.1   | 40.1   | 40.1   | 93894  | 40.1   | 93894  | 93894  | 40.1   | 93894  | 40.1   | 93894   | 40.1   | 93894  | 93894  |
| 16        | 209100 | 209100 | 5603.6  | 5603.6 | 209100   | 209100 | 5603.6   | 209100 | Root | 5603.6   | 209100 | 209100        | 86.9   | 86.9   | 86.9   | 209100 | 86.9   | 209100 | 209100 | 86.9   | 209100 | 86.9   | 209100  | 86.9   | 209100 | 209100 |
| 21        | 457836 | 457836 | 1248.7  | 1248.7 | 457836   | 457836 | 1248.7   | 457836 | Root | 1248.7   | 457836 | 457836        | 215.1  | 215.1  | 215.1  | 457836 | 215.1  | 457836 | 457836 | 215.1  | 457836 | 215.1  | 457836  | 215.1  | 457836 | 457836 |
| 31        | 12729  | 12729  | 927.7   | 927.7  | 12729    | 12729  | 927.7    | 12729  | Root | 927.7    | 12729  | 12729         | 104.1  | 104.1  | 104.1  | 12729  | 104.1  | 12729  | 12729  | 104.1  | 12729  | 104.1  | 12729   | 104.1  | 12729  | 12729  |
| <b>36</b> | 56671  | 56590  | 1435.7  | >14400 | >14400   | <56671 | 56671    | 56671  | Root | >14400   | 56671  | <b>56671</b>  | 347.6  | 347.6  | 347.6  | 56671  | 347.6  | 56671  | 56671  | 347.6  | 56671  | 347.6  | 56671   | 347.6  | 56671  | 56671  |
| 41        | 237964 | 237841 | 20436.3 | >20436 | 120721.7 | MIP    | 141158.0 | 237964 | MIP  | 141158.0 | 237964 | <b>237884</b> | 2201.7 | 2201.7 | 2201.7 | 237964 | 2201.7 | 237964 | 237964 | 2201.7 | 237964 | 2201.7 | 237964  | 2201.7 | 237964 | 237964 |

Table C5: continued

| Inst       | BCP-PMWT |        |         |         |               |      | BCP-PMWT-OTI |         |               |               |               |      |        |         |
|------------|----------|--------|---------|---------|---------------|------|--------------|---------|---------------|---------------|---------------|------|--------|---------|
|            | Root     |        | BCP     |         | CPLEX Overall |      | Root         |         | BCP           |               | CPLEX Overall |      |        |         |
|            | UB       | LB     | Time    | Time    | Time          | Best | Time         | Opt     | UB            | LB            | Time          | Best | Time   | Opt     |
| 46         | 422831   | 422830 | 2077.9  | 44.1    | 51.9          | BCP  | 2122.0       | 422831  | 422831        | 422831        | 171.9         | Root | 171.9  | 422831  |
| 56         | 5047     | 5047   | 1582.3  | >14400  | >86400        | Root | 1582.3       | 5047    | 5047          | 5047          | 152.4         | Root | 152.4  | 5047    |
| <b>61</b>  | 45573    | 45481  | 7353.8  | >14400  | >86400        | Root | >14400       | ≤45573  | 45573         | <b>45573</b>  | 275.5         | Root | 275.5  | 45573   |
| 66         | 126522   | 126477 | 7526.5  | 23425.6 | >86400        | BCP  | 30952.1      | 126512  | <b>126513</b> | <b>126503</b> | 1976.3        | BCP  | 2878.7 | 126513  |
| 71         | 327305   | 327305 | 630.2   | >14400  | >86400        | Root | 630.2        | 327305  | 327305        | 327305        | 57.6          | Root | 57.6   | 327305  |
| <b>81</b>  | 908      | 830    | 1299.2  | >14400  | >86400        | Root | >14400       | ≤908    | 908           | <b>908</b>    | 198.9         | Root | 198.9  | 908     |
| <b>86</b>  | 36581    | 36322  | 3905.2  | >14400  | >86400        | Root | >14400       | ≤36581  | 36581         | <b>36581</b>  | 262.8         | Root | 262.8  | 36581   |
| <b>91</b>  | 129931   | 129752 | 4259.4  | >14400  | >86400        | Root | >14400       | ≤129931 | <b>129929</b> | <b>129804</b> | 6258.5        | Root | 6258.5 | ≤129929 |
| 96         | 254194   | 254194 | 1030.5  | >14400  | >86400        | Root | 1030.5       | 254194  | 254194        | 254194        | 185.9         | Root | 185.9  | 254194  |
| <b>111</b> | 84274    | 84097  | 7424.3  | >14400  | >86400        | Root | >14400       | ≤84250  | <b>84220</b>  | <b>84220</b>  | 219.5         | Root | 219.5  | 84220   |
| 116        | 191198   | 191173 | 11740.2 | >14400  | 32567.7       | MIP  | 44307.9      | 191186  | <b>191186</b> | <b>191186</b> | 2373.0        | Root | 2373.0 | 191186  |
| 121        | 242022   | 241997 | 57559.6 | >86400  | 4072.4        | MIP  | 61632.0      | 242018  | <b>242018</b> | <b>242018</b> | 181.1         | Root | 181.1  | 242018  |

Table C6: Detailed Results for  $m = 4$  and  $n = 100$  instances

| Inst | BCP-PMWT |              |        |         |          |         |               |      |          |               | BCP-PMWT-OTI  |        |          |          |          |         |         |         |       |     |
|------|----------|--------------|--------|---------|----------|---------|---------------|------|----------|---------------|---------------|--------|----------|----------|----------|---------|---------|---------|-------|-----|
|      | Root     |              |        |         |          | Overall |               |      |          |               | Root          |        |          |          |          | Overall |         |         |       |     |
|      | UB       | LB           | Time   | BCP     | Time     | CPLEX   | Time          | Best | Time     | Opt           | UB            | LB     | Time     | BCP      | Time     | CPLEX   | Time    | Best    | Time  | Opt |
| 1    | 2001     | 2001         | 1337.3 |         | 1337.3   | 2001    | 2001          | Root | 1337.3   | 2001          | 2001          | 156.1  |          | 156.1    | 49519.51 | Root    | 156.1   | 156.1   | 2001  |     |
| 11   | 50236    | 50203        | 1439.4 | >14400  | >14400   | ≤50236  | <b>50232</b>  |      | >14400   | 50203         | 50203         | 315.4  | >14106.9 | >14106.9 | 49519.51 | MIP     | 49834.9 | 49834.9 | 50232 |     |
| 16   | 110222   | 110118       | 1449.2 | >14400  | >14400   | ≤110222 | <b>110219</b> |      | >14400   | <b>110120</b> | <b>110120</b> | 249.5  | >14164.0 | >14164.0 | ≥86400   |         | 249.5   | ≤110219 |       |     |
| 21   | 237392   | 237390       | 1493.8 | 5.5     | 5.5      | 237392  | 237392        | BCP  | 1499.3   | 237392        | <b>237391</b> | 375.8  | 10.1     | 2.52     | BCP      | 385.9   | 385.9   | 237392  |       |     |
| 31   | 7130     | 7082         | 1901.5 | >14400  | >14400   | ≤7130   | 7130          |      | >14400   | 7082          | 7082          | 311.2  | >14242.3 | ≥86400   |          | 311.2   | 311.2   | ≤7130   |       |     |
| 36   | 30791    | <b>30783</b> | 2201.3 | >14400  | >14400   | ≤30791  | 30791         |      | >14400   | 30782         | 30782         | 427.9  | >14035.1 | 610.22   | MIP      | 1038.1  | 1038.1  | 30791   |       |     |
| 41   | 126193   | 126144       | 1493.6 | 11041.3 | 41682.9  | 126185  | <b>126185</b> | BCP  | 12534.9  | <b>126147</b> | <b>126147</b> | 1376.4 | 6314.4   | 1617.61  | MIP      | 2994.0  | 2994.0  | 126185  |       |     |
| 46   | 219537   | 219529       | 1372.0 | 256.3   | 800.9    | 219536  | <b>219536</b> | BCP  | 1628.3   | 219529        | 219529        | 578.3  | 401.9    | 170.21   | MIP      | 748.5   | 748.5   | 219536  |       |     |
| 56   | 3076     | 3030         | 1727.3 | >14400  | >14400   | ≤3076   | 3076          |      | >14400   | 3030          | 3030          | 586.3  | >13884.5 | ≥86400   |          | 586.3   | 586.3   | ≤3076   |       |     |
| 61   | 24868    | 24821        | 1682.5 | >14400  | >14400   | ≤24868  | <b>24856</b>  |      | >14400   | <b>24825</b>  | <b>24825</b>  | 548.8  | >13936.3 | 1233.98  | MIP      | 1782.8  | 1782.8  | 24856   |       |     |
| 66   | 67979    | 67954        | 1267.7 | 2885.7  | 3738.2   | 67967   | <b>67970</b>  | BCP  | 4153.4   | <b>67955</b>  | <b>67955</b>  | 723.0  | 2134.1   | 483.20   | MIP      | 1206.2  | 1206.2  | 67967   |       |     |
| 71   | 170699   | 170675       | 862.9  | >14400  | 81028.1  | 170689  | <b>170691</b> | MIP  | 81891.0  | 170675        | 170675        | 568.4  | >85907.8 | 3874.12  | MIP      | 4442.5  | 4442.5  | 170689  |       |     |
| 81   | 819      | 772          | 1594.4 | >14400  | >14400   | ≤819    | 819           |      | >14400   | <b>784</b>    | <b>784</b>    | 466.1  | 767.9    | 5785.43  | BCP      | 1234.0  | 1234.0  | 819     |       |     |
| 86   | 21299    | 21218        | 1379.0 | >14400  | >14400   | ≤21299  | <b>21286</b>  |      | >14400   | <b>21220</b>  | <b>21220</b>  | 823.8  | >13608.3 | 15326.80 | MIP      | 16150.6 | 16150.6 | 21282   |       |     |
| 91   | 70612    | <b>70589</b> | 2119.4 | 1436.3  | 7318.0   | 70606   | <b>70608</b>  | BCP  | 3555.7   | 70588         | 70588         | 1269.8 | 1716.1   | 401.22   | MIP      | 1671.0  | 1671.0  | 70606   |       |     |
| 96   | 133591   | 133575       | 878.6  | 3156.3  | 1930.3   | 133587  | <b>133587</b> | MIP  | 2808.9   | 133575        | 133575        | 1028.7 | 332.4    | 122.28   | MIP      | 1151.0  | 1151.0  | 133587  |       |     |
| 111  | 46763    | 46630        | 1704.6 | >14400  | >86400   | ≤46747  | <b>46719</b>  |      | >14400   | <b>46633</b>  | <b>46633</b>  | 957.1  | >13496.4 | 28468.37 | MIP      | 29425.5 | 29425.5 | 46704   |       |     |
| 116  | 101563   | 101520       | 1374.6 | >14400  | 156440.1 | 101546  | <b>101551</b> | MIP  | 157814.7 | <b>101521</b> | <b>101521</b> | 790.4  | 55690.0  | 3608.02  | MIP      | 4398.4  | 4398.4  | 101546  |       |     |
| 121  | 127639   | 127597       | 1389.6 | >14400  | 108063.9 | 127618  | <b>127619</b> | MIP  | 109453.5 | <b>127598</b> | <b>127598</b> | 904.9  | 17652.2  | 815.18   | MIP      | 1720.1  | 1720.1  | 127618  |       |     |
